# Supplementary material for: IRAK3 Knockout and Wildtype THP-1 Monocytes as Models for Endotoxin Detection Assays and Fusobacterium nucleatum Bacteriophage FNU1 Cytokine Induction
Source: MDPI journal article supplement (doi:10.3390/ijms242015108), 2023-10-12
Supplement: s1 [file s1]

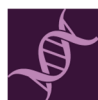

## Supplementary materials

**Table S1. Production of TNF- $\alpha$  by THP-1 wildtype (WT) and IRAK3 knockout monocytes**

| Treatment |                                | TNF- $\alpha$ concentration (pg/mL) |                             |        |                             |         |
|-----------|--------------------------------|-------------------------------------|-----------------------------|--------|-----------------------------|---------|
|           |                                | Minimum                             | 25 <sup>th</sup> percentile | Median | 75 <sup>th</sup> percentile | Maximum |
| 1         | PBS (WT)                       | 0.67                                | 6.71                        | 10.48  | 13.84                       | 18.94   |
| 2         | Purified FNU1 (WT)             | 0.00                                | 0.23                        | 2.34   | 7.00                        | 12.49   |
| 3         | LPS (WT)                       | 34.21                               | 44.58                       | 64.92  | 123.51                      | 193.80  |
| 4         | Crude FNU1 (WT)                | 29.08                               | 36.47                       | 55.51  | 75.58                       | 107.43  |
| 5         | PBS (IRAK3 Knockout)           | 0.00                                | 0.17                        | 0.89   | 2.28                        | 5.35    |
| 6         | Purified FNU1 (IRAK3 Knockout) | 0.00                                | 0.13                        | 1.06   | 3.75                        | 9.13    |
| 7         | LPS (IRAK3 Knockout)           | 40.47                               | 66.15                       | 100.95 | 142.48                      | 157.89  |
| 8         | Crude FNU1 (IRAK3 Knockout)    | 147.91                              | 161.79                      | 172.13 | 246.16                      | 267.90  |

**Table S2. Production of IL-6 by wildtype (WT) and IRAK3 knockout THP-1 monocytes**

| Treatment |                                | IL-6 concentration (pg/mL) |                             |        |                             |         |
|-----------|--------------------------------|----------------------------|-----------------------------|--------|-----------------------------|---------|
|           |                                | Minimum                    | 25 <sup>th</sup> percentile | Median | 75 <sup>th</sup> percentile | Maximum |
| 1         | PBS (WT)                       | 0.00                       | 5.13                        | 8.54   | 12.70                       | 22.76   |
| 2         | Purified FNU1 (WT)             | 0.00                       | 2.80                        | 6.10   | 20.89                       | 47.47   |
| 3         | LPS (WT)                       | 11.55                      | 32.03                       | 48.12  | 77.52                       | 111.36  |
| 4         | Crude FNU1 (WT)                | 15.21                      | 32.57                       | 48.69  | 137.03                      | 246.05  |
| 5         | PBS (IRAK3 Knockout)           | 0.00                       | 4.48                        | 8.01   | 26.62                       | 51.11   |
| 6         | Purified FNU1 (IRAK3 Knockout) | 0.00                       | 1.58                        | 3.49   | 37.83                       | 65.90   |
| 7         | LPS (IRAK3 Knockout)           | 44.35                      | 55.54                       | 133.35 | 139.49                      | 179.78  |
| 8         | Crude FNU1 (IRAK3 Knockout)    | 143.05                     | 168.34                      | 178.51 | 185.42                      | 210.77  |

**Table S3. Production of IL-10 by wildtype (WT) and IRAK3 knockout THP-1 monocytes**

| Monocyte type  | Treatment     | IL-10 concentration (pg/mL) |                             |        |                             |         |
|----------------|---------------|-----------------------------|-----------------------------|--------|-----------------------------|---------|
|                |               | Minimum                     | 25 <sup>th</sup> percentile | Median | 75 <sup>th</sup> percentile | Maximum |
| Wildtype       | PBS           | 0                           | 0.14                        | 0.68   | 1.725                       | 3.28    |
|                | Purified FNU1 | 0                           | 0.43                        | 1.295  | 3.9975                      | 6.35    |
|                | LPS           | 1.05                        | 4.525                       | 6.64   | 8.105                       | 11.34   |
|                | Crude FNU1    | 0.96                        | 8.02                        | 13.8   | 15.38                       | 24.39   |
| IRAK3 knockout | PBS           | 0                           | 1.38                        | 2.49   | 8.29                        | 16.52   |
|                | Purified FNU1 | 0                           | 2.2625                      | 5.37   | 6.475                       | 12.31   |
|                | LPS           | 0.11                        | 1.5175                      | 3.945  | 6.66                        | 8.94    |
|                | Crude FNU1    | 1.15                        | 3.44                        | 5.83   | 9.55                        | 17.25   |

**Table S4. Levels of endotoxins present in purified and crude bacteriophage FNU1 quantified using an endotoxin detection kit**

| Bacteriophage preparation | Levels of endotoxin (EU/mL) |                             |          |                             |          |
|---------------------------|-----------------------------|-----------------------------|----------|-----------------------------|----------|
|                           | Minimum                     | 25 <sup>th</sup> percentile | Median   | 75 <sup>th</sup> percentile | Maximum  |
| Crude FNU1                | 13988.85                    | 31728.33                    | 61632.03 | 65560.06                    | 85453.62 |
| Purified FNU1             | 1.55                        | 1.90                        | 2.02     | 2.17                        | 2.24     |

**Table S5. Estimated levels of endotoxin present in THP-1 knockout out samples after crude and purified FNU1 treatment using the new endotoxin assay**

| Cytokine      | Bacteriophage Preparation | Levels of endotoxin (EU/mL) |                             |           |                             |           |
|---------------|---------------------------|-----------------------------|-----------------------------|-----------|-----------------------------|-----------|
|               |                           | Minimum                     | 25 <sup>th</sup> percentile | Median    | 75 <sup>th</sup> percentile | Maximum   |
| IL-6          | Crude FNU1                | 52970.57                    | 61151.40                    | 106543.61 | 197374.35                   | 347747.78 |
|               | Purified FNU1             | 0.13                        | 0.97                        | 4.19      | 22.07                       | 37.71     |
| TNF- $\alpha$ | Crude FNU1                | 78376.38                    | 115839.37                   | 179524.57 | 234155.79                   | 244456.83 |
|               | Purified FNU1             | 2.40                        | 3.00                        | 5.36      | 8.59                        | 15.18     |

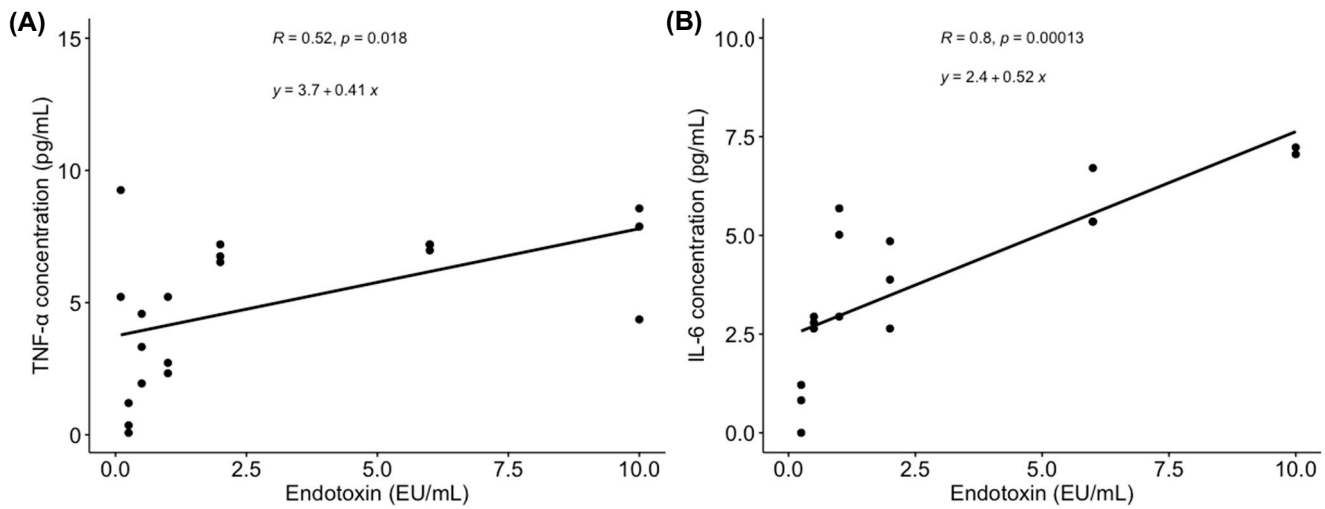

Figure S1. Standard curve of cytokine production by THP-1 wildtype monocytes against endotoxin levels; (A) TNF- $\alpha$  indicate an  $R = 0.52$  and 27% chance of predicting endotoxin levels from an  $R^2$  of 0.27, while (B) IL-6 indicate an  $R = 0.8$  and 64% chance of predicting endotoxin levels from  $R^2 = 0.64$ .

Known endotoxin concentrations (10, 6, 2, 1, 0.5, 0.25, 0.1, 0 EU/mL) were incubated with THP-1 monocytes over 24 hours. Cell supernatant was collected and analysed for cytokine production by ELISA.
